# Supplementary material
Source: publisher figshare collection journal article supplement (https://frontiersin.figshare.com/ndownloader/files/20800101)
Supplement: Supplementary file [file 20800101]

**Supplementary Table 1. Univariate Cox proportional hazard analyses for all clinical variables considered in this study.**

REF: reference group

| Variable                  |                  | N   | Locoregional Regression  |               | Mortality                |                | Progression              |               | Distant Metastasis       |              |
|---------------------------|------------------|-----|--------------------------|---------------|--------------------------|----------------|--------------------------|---------------|--------------------------|--------------|
|                           |                  |     | HR (95% CI)              | p-value       | HR (95% CI)              | p-value        | HR (95% CI)              | p-value       | HR (95% CI)              | p-value      |
| Age at diagnosis          | ≥65              | 55  | 0.749 (0.38-1.47)        | 0,4           | 1.176 (0.77-1.8)         | 0,45           | 0.984 (0.65-1.49)        | 0,94          | 0.844 (0.4-1.78)         | 0,66         |
|                           | <65              | 142 | REF                      |               | REF                      |                | REF                      |               | REF                      |              |
| Sex                       | female           | 55  | 0.515 (0.25-1.06)        | 0,072         | 0.65 (0.42-1.01)         | 0,055          | 0.729 (0.48-1.1)         | 0,13          | <b>0.334 (0.13-0.85)</b> | <b>0,022</b> |
|                           | male             | 142 | REF                      |               | REF                      |                | REF                      |               | REF                      |              |
| Alcohol                   | no               | 22  | 1.235 (0.52-2.95)        | 0,64          | 0.769 (0.4-1.49)         | 0,44           | 0.813 (0.43-1.52)        | 0,52          | 0.243 (0.03-1.79)        | 0,17         |
|                           | former alcoholic | 22  | <b>2.158 (1.03-4.52)</b> | <b>0,041</b>  | <b>1.76 (1.05-2.95)</b>  | <b>0,032</b>   | 1.59 (0.95-2.66)         | 0,076         | <b>2.68 (1.25-5.73)</b>  | <b>0,011</b> |
|                           | yes              | 146 | REF                      |               | REF                      |                | REF                      |               | REF                      |              |
|                           | missing          | 7   |                          |               |                          |                |                          |               |                          |              |
| Tobacco                   | never            | 5   | 0 (0-Inf)                | 1             | 0.724 (0.18-2.94)        | 0,65           | 0.575 (0.14-2.33)        | 0,44          | 0 (0-Inf)                | 1            |
|                           | former smoker    | 30  | 0.463 (0.17-1.29)        | 0,14          | 0.657 (0.37-1.16)        | 0,15           | 0.594 (0.34-1.05)        | 0,071         | 0.65 (0.23-1.83)         | 0,42         |
|                           | yes              | 156 | REF                      |               | REF                      |                | REF                      |               | REF                      |              |
|                           | missing          | 6   |                          |               |                          |                |                          |               |                          |              |
| Tumour subsite            | Larynx           | 34  | 1.47 (0.73-2.96)         | 0,28          | 0.615 (0.35-1.09)        | 0,094          | 0.822 (0.49-1.38)        | 0,46          | 1.026 (0.47-2.25)        | 0,95         |
|                           | Hypopharynx      | 78  | 0.708 (0.37-1.37)        | 0,3           | <b>0.517 (0.34-0.78)</b> | <b>0,0017</b>  | <b>0.555 (0.37-0.83)</b> | <b>0,0039</b> | <b>0.436 (0.2-0.93)</b>  | <b>0,032</b> |
|                           | Oropharynx       | 85  |                          |               |                          |                |                          |               |                          |              |
| Tumour volume             | ≥25.4 cc         | 70  | 1.754 (0.96-3.19)        | 0,066         | <b>2.147 (1.42-3.24)</b> | <b>0,00027</b> | <b>1.832 (1.23-2.72)</b> | <b>0,0027</b> | 1.513 (0.76-3)           | 0,23         |
|                           | <25.4 cc         | 96  | REF                      |               | REF                      |                | REF                      |               | REF                      |              |
|                           | missing          | 31  |                          |               |                          |                |                          |               |                          |              |
| Stage                     | IVB              | 20  | 0.896 (0.35-2.28)        | 0,82          | <b>1.803 (1.06-3.06)</b> | <b>0,029</b>   | 1.438 (0.85-2.42)        | 0,17          | 2.093 (0.95-4.6)         | 0,066        |
|                           | III              | 40  | 0.443 (0.19-1.05)        | 0,064         | 0.607 (0.36-1.03)        | 0,063          | <b>0.521 (0.31-0.88)</b> | <b>0,014</b>  | 0.306 (0.09-1.01)        | 0,051        |
|                           | II               | 2   | 0 (0-Inf)                | 1             | 1.133 (0.16-8.17)        | 0,9            | 0.819 (0.11-5.9)         | 0,84          | 0 (0-Inf)                | 1            |
|                           | IVA              | 135 | REF                      |               | REF                      |                | REF                      |               | REF                      |              |
| Cumulative cisplatin dose | <200mg/cm2       | 67  | <b>2.569 (1.45-4.56)</b> | <b>0,0012</b> | <b>1.737 (1.18-2.55)</b> | <b>0,0049</b>  | <b>1.704 (1.18-2.47)</b> | <b>0,0048</b> | 1.175 (0.6-2.29)         | 0,64         |
|                           | ≥200mg/cm2       | 126 | REF                      |               | REF                      |                | REF                      |               | REF                      |              |
|                           | missing          | 4   |                          |               |                          |                |                          |               |                          |              |
